# Supplementary material
Source: publisher figshare collection journal article supplement (https://acs.figshare.com/ndownloader/files/10238820)
Supplement: Supplementary file 1 [file 10238820]

## **Supporting Information for**

# **Targeted drug delivery and treatment of endoparasites with biocompatible particles of pH responsive structure**

*Patrick D. Mathews<sup>a\*</sup>, Ana C. M. Fernandes Patta<sup>a</sup>, Joao V. Gonçalves<sup>a</sup>,  
Gabriella dos Santos Gama<sup>a</sup>, Irene T. S. Garcia<sup>b</sup>, Omar Mertins<sup>a\*</sup>*

<sup>a</sup>Department of Biophysics, Paulista School of Medicine, Federal University of Sao Paulo,  
Sao Paulo 04023-062, Brazil

<sup>b</sup>Department of Physical-Chemistry, Institute of Chemistry, Federal University of Rio Grande  
do Sul, Porto Alegre 91501-970, Brazil

\*Address correspondence to Patrick D. Mathews and Omar Mertins  
E-mails: patrickmathews83@gmail.com; mertins@unifesp.br

## Supporting Information

**Table S1.** Initial masses used in preparation of triplicates (1-3) of alginate/chitosan particles free of drug (ALGCH), in presence of 38  $\mu$ M mebendazole (MB) or 38  $\mu$ M ivermectin (IVM); recovered masses obtained after lyophilization of supernatants in the particles washing procedure and corresponding averages with standard deviation.

| Sample        | Initial mass (mg) | Recovered mass (mg) | Average of recovered masses (mg) |
|---------------|-------------------|---------------------|----------------------------------|
| ALGCH (1)     | 100.00            | 13.81               | 15.93 $\pm$ 2.22                 |
| ALGCH (2)     | 100.00            | 15.73               |                                  |
| ALGCH (3)     | 100.00            | 18.24               |                                  |
| ALGCH-MB (1)  | 111.21            | 14.26               | 15.77 $\pm$ 1.75                 |
| ALGCH-MB (2)  | 111.21            | 15.35               |                                  |
| ALGCH-MB (3)  | 111.21            | 17.69               |                                  |
| ALGCH-IVM (1) | 133.25            | 12.93               | 16.39 $\pm$ 3.02                 |
| ALGCH-IVM (2) | 133.25            | 17.72               |                                  |
| ALGCH-IVM (3) | 133.25            | 18.51               |                                  |
|               |                   |                     | Total average: 16.03 mg          |

**Table S2.** Hydrodynamic diameters (Dh, nm) obtained by DLS for 0.1 mg/mL solutions of chitosan (CH) and alginate (ALG) in different buffers (80 mM) at 25 °C. Maximal pH variation was 0.02. Dh are average of five independent measurements and variations are standard deviation. Aggregates represent particles size over 2  $\mu$ m.

| pH     | 2.50        | 3.79         | 4.10         | 4.32         | 4.50         | 6.50        |
|--------|-------------|--------------|--------------|--------------|--------------|-------------|
| CH Dh  | 41 $\pm$ 18 | 47 $\pm$ 26  | 58 $\pm$ 17  | 52 $\pm$ 23  | 71 $\pm$ 15  | aggregates  |
| ALG Dh | aggregates  | 241 $\pm$ 78 | 119 $\pm$ 51 | 137 $\pm$ 42 | 108 $\pm$ 47 | 87 $\pm$ 32 |
